# Supplementary material for: Spatial Distribution of Recurrence and Long-Term Toxicity Following Dose Escalation to the Dominant Intra-Prostatic Nodule for Intermediate-High Risk Prostate Cancer: Insights from a Phase I/II Study
Source: Preprints.org preprint supplement (doi:10.20944/preprints202405.1655.v1), 2024-05-24

Supplementary Materials


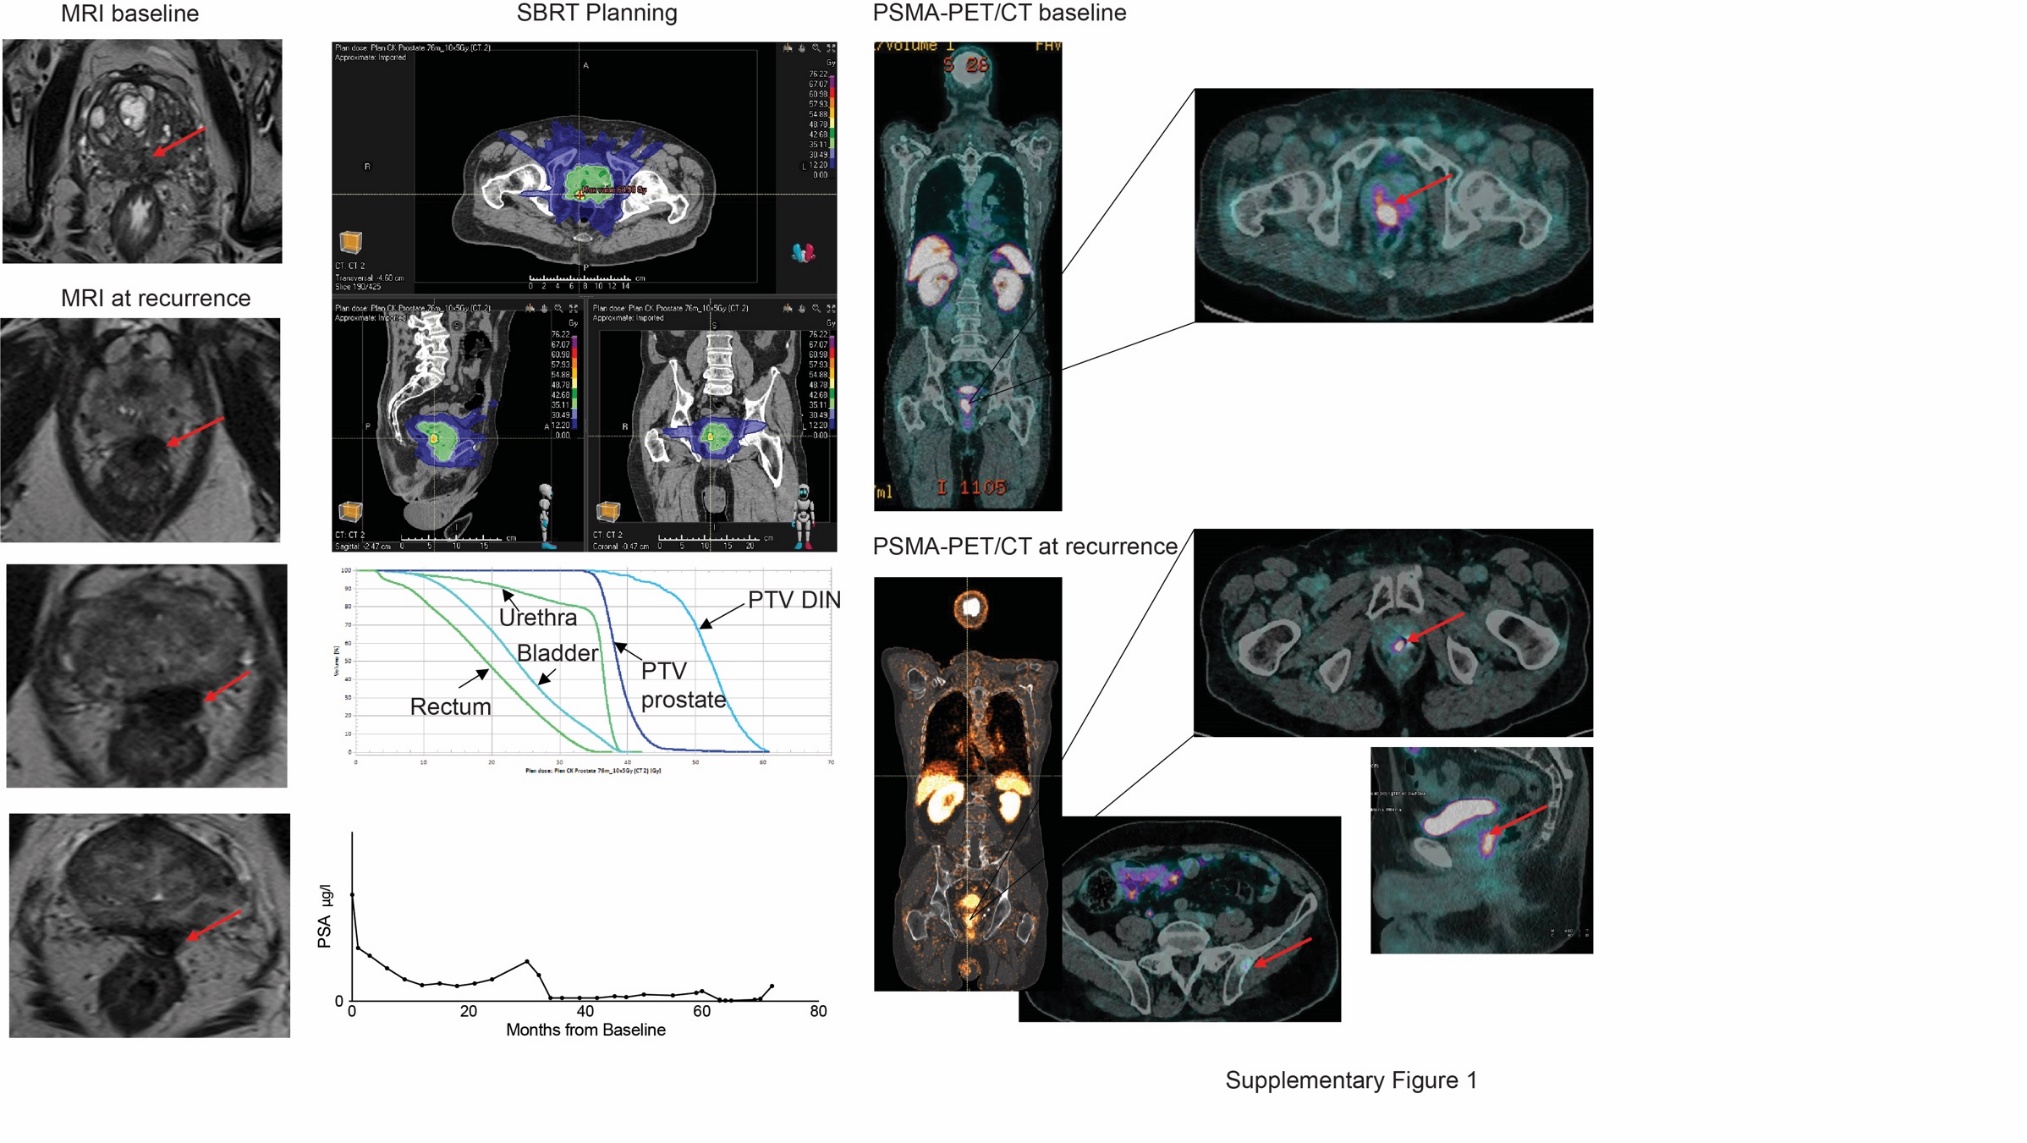


**Figure S1.** legend: Description of a patient’s case (T3a, GS 4+3, PSA baseline 12.6 μg/l) with mpMRI and 68Ga-PSMA-PET/CT at baseline and at recurrence. SBRT histograms. Evolution of PSA values.


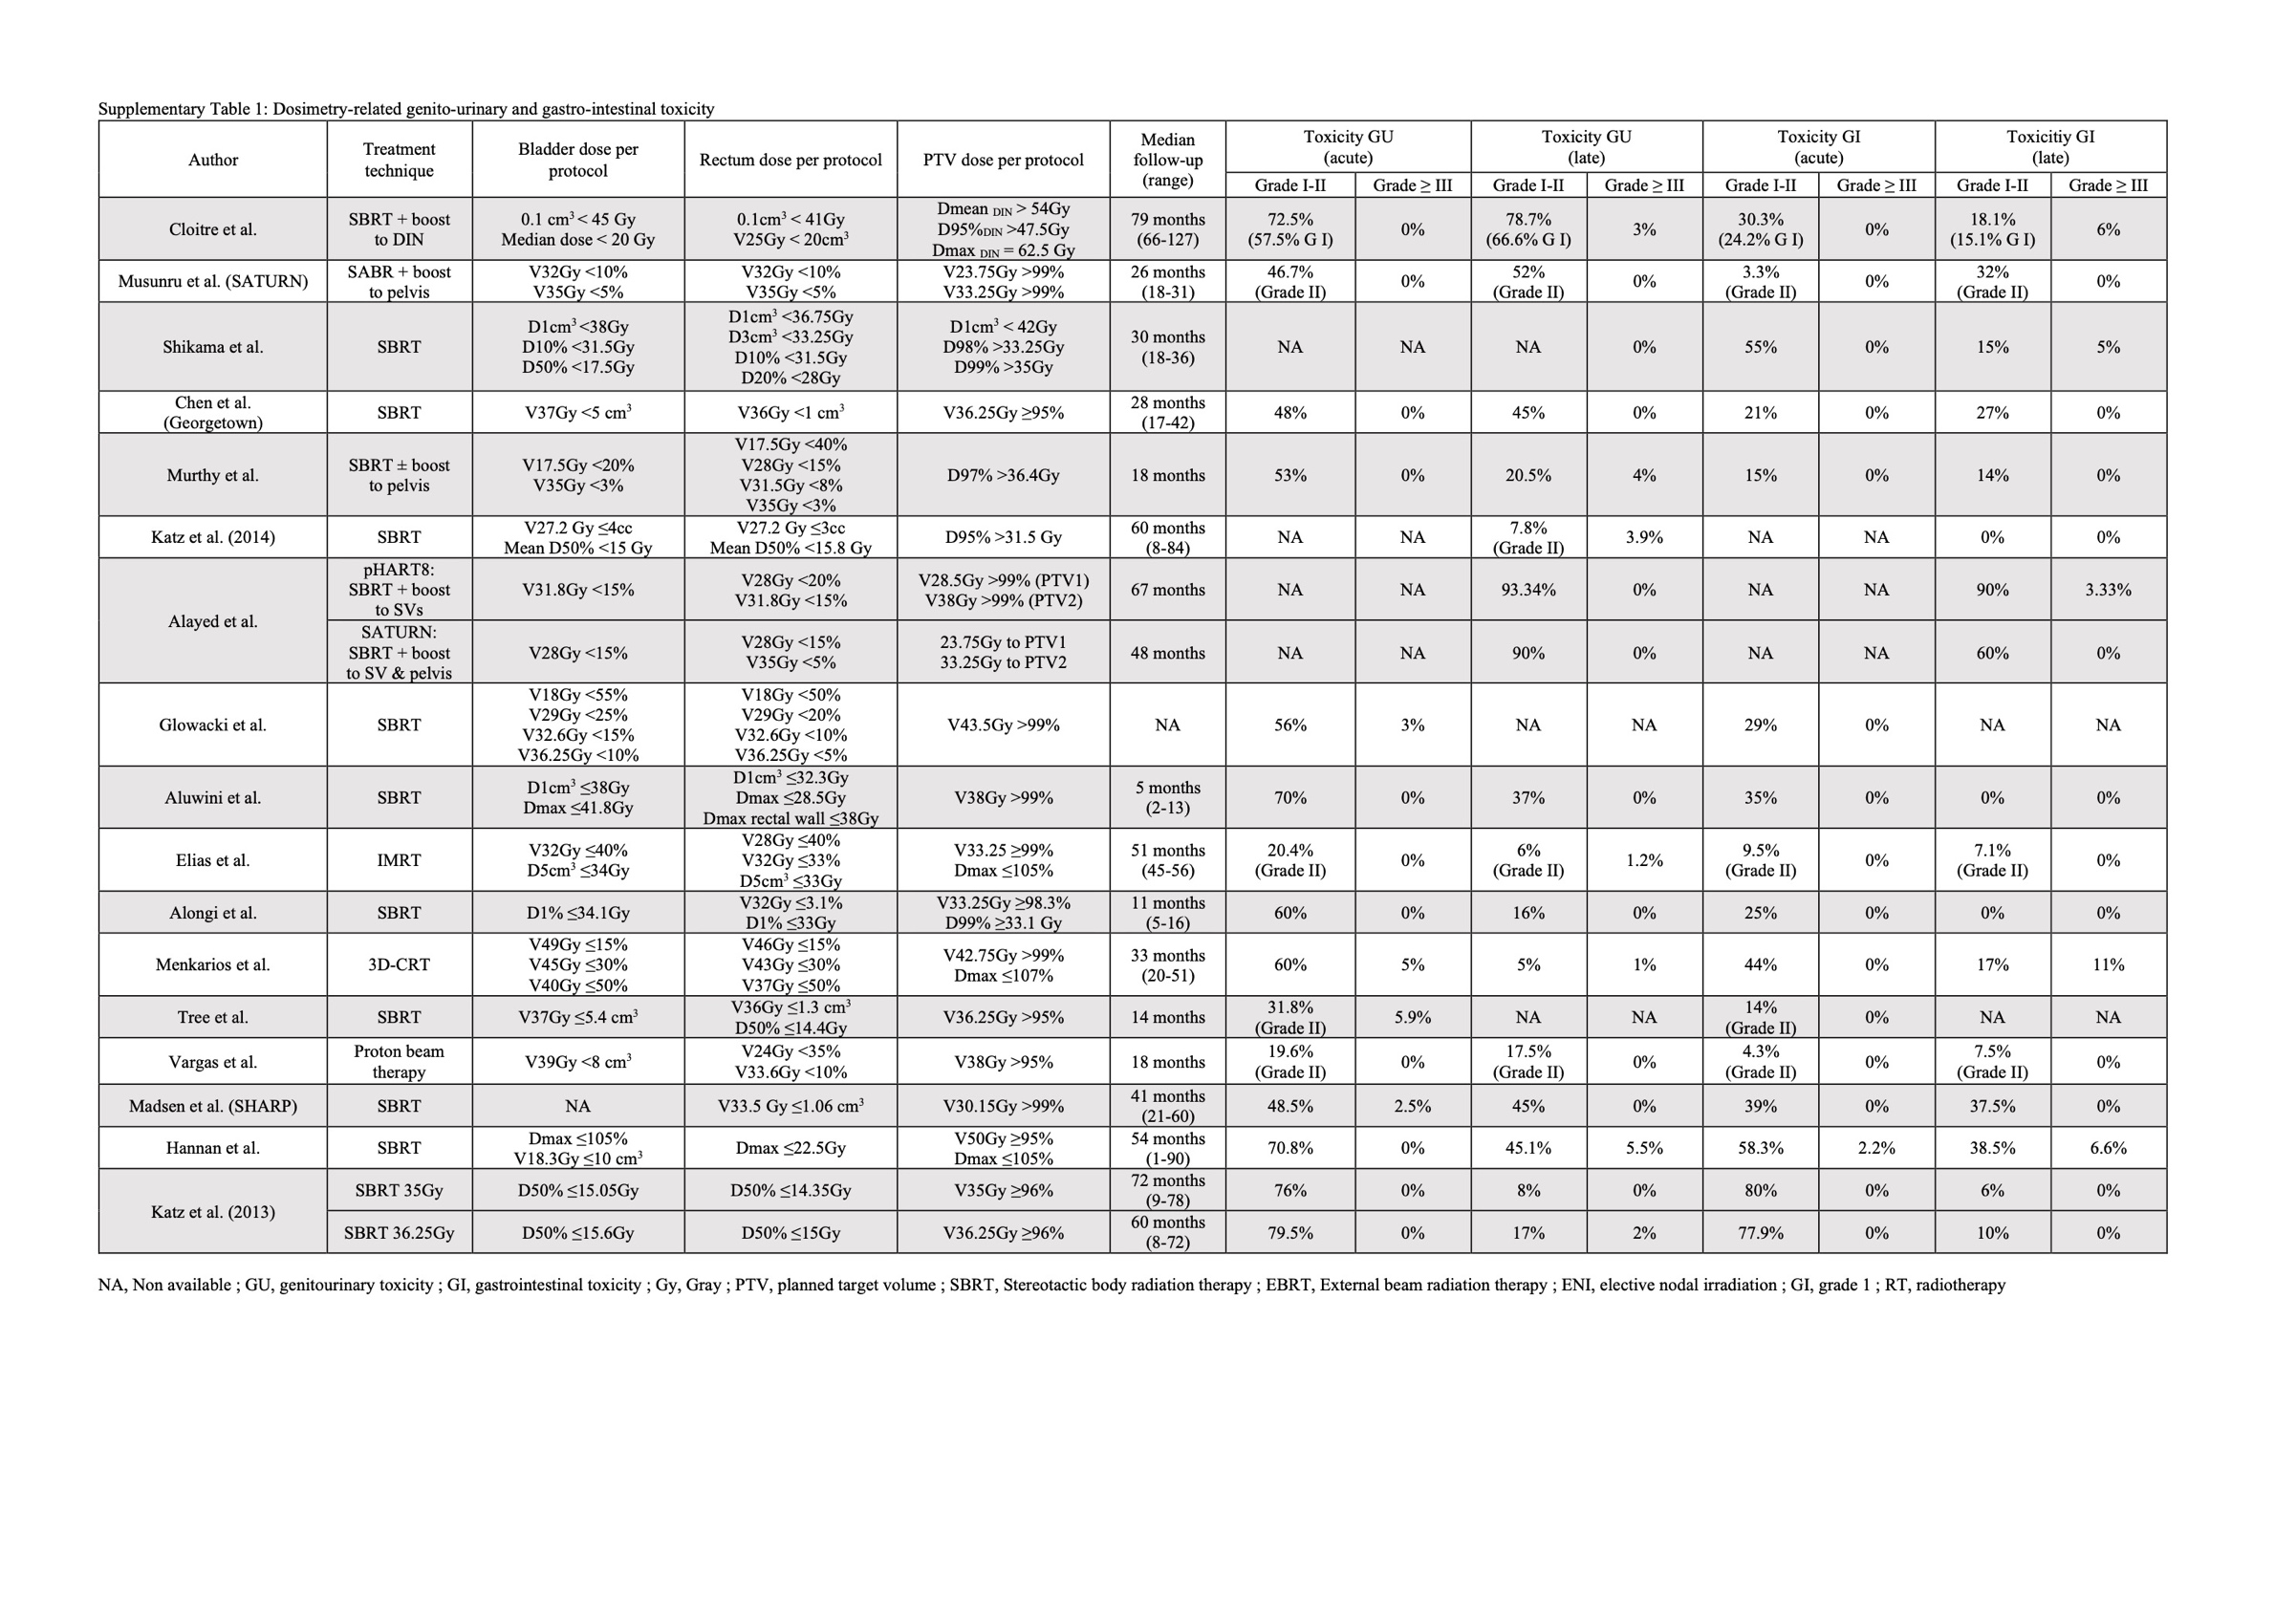

Supplement: Supplementary file 1 [file supplementary]
